# Supplementary material for: Reprogramming to a muscle fate by fusion recapitulates differentiation
Source: Oxford University Press journal article supplement (doi:10.1242/jcs.041376), 2009-03-18
Supplement: jcs041376-sup-041376-tables1.pdf [file jcs041376-sup-041376-tables1.pdf]

**Table S1. Complete list of genes with the fold change in expression compared with control HepG2 pre-fusion**

|             |                             |                        | Pre Fusion |         | C2 +HepG2 MyoD prePEG |         | Day6 Heterokaryons |          | C2 +HepG2 TSA Day6 |          | C2 + HepG2 MyoD Day6 |          |
|-------------|-----------------------------|------------------------|------------|---------|-----------------------|---------|--------------------|----------|--------------------|----------|----------------------|----------|
| Acc_Num     | name                        | category               | FoldChange | P.value | Fold Change           | P.value | FoldChange         | P.value  | Fold Change        | P.value  | Fold Change          | P.value  |
| NM_000069   | CACNA1S: cal                | contraction/excitation | 0.8619     | 0.7742  | 0.938                 | 0.6264  | 1.1593             | 0.3299   | 0.7509             | 0.9691   | 1.1102               | 0.6783   |
| NM_000079   | CHRNA1: choli               | contraction/excitation | 0.8594     | 0.8457  | 1.1036                | 0.3786  | 1.464              | 0.1608   | 1.4707             | 0.2377   | 4.0237               | 0.0026   |
| NM_000257   | MYH7: myosin                | contraction/excitation | 0.8182     | 0.8477  | 0.9535                | 0.5966  | 0.9969             | 0.6441   | 1.3506             | 0.3091   | 1.4363               | 0.4114   |
| NM_000334   | SCN4A: sodiur               | contraction/excitation | 0.8439     | 0.7964  | 1.0076                | 0.5227  | 0.9228             | 0.7493   | 1.1117             | 0.5722   | 0.8686               | 0.8478   |
| NM_000727   | CACNG1: calci               | contraction/excitation | 0.6406     | 0.9662  | 0.8954                | 0.5747  | 0.8695             | 0.7409   | 0.881              | 0.7855   | 1.534                | 0.2087   |
| NM_001100.3 | actin, alpha 1,             | contraction/excitation | 1.385      | 0.0718  | 1.082                 | 0.3137  | 1.9102             | 0.077    | 2.9504             | 0.0043   | 4.6586               | 2.00E-04 |
| NM_002465   | MYBPC1: myo:                | contraction/excitation | 0.9474     | 0.6742  | 0.7379                | 0.9596  | 1.555              | 0.1084   | 1.9449             | 0.0624   | 3.8649               | 0.003    |
| NM_003279   | TNNC2: tropor               | contraction/excitation | 0.493      | 0.9784  | 0.6436                | 0.9434  | 3.31               | 8.00E-04 | 2.3265             | 0.0257   | 15.9675              | 0        |
| NM_003280   | TNNC1: tropor               | contraction/excitation | 0.8669     | 0.4876  | 0.9613                | 0.1539  | 2.1734             | 0.0067   | 3.2609             | 0.0014   | 10.8374              | 0        |
| NM_003281   | TNNI1: tropon               | contraction/excitation | 0.9449     | 0.7782  | 1.1796                | 0.2585  | 1.0357             | 0.6638   | 0.9635             | 0.8324   | 1.1199               | 0.6399   |
| NM_003282   | TNNI2: tropon               | contraction/excitation | 1.527      | 0.0212  | 0.6185                | 0.9957  | 1.446              | 0.0278   | 3.9885             | 3.00E-04 | 4.0792               | 0.0057   |
| NM_003283   | TNNT1: tropor               | contraction/excitation | 1.255      | 0.0425  | 0.7688                | 0.3444  | 1.9558             | 0.0053   | 3.771              | 1.00E-04 | 11.0939              | 0        |
| NM_004320   | ATP2A1: ATPa                | contraction/excitation | 0.8948     | 0.7738  | 0.661                 | 0.9886  | 1.5394             | 0.0599   | 3.5177             | 1.00E-04 | 2.63                 | 0.0666   |
| NM_006757   | TNNT3: tropor               | contraction/excitation | 1.0112     | 0.0335  | 1.0112                | 0.3479  | 1.9139             | 0.0177   | 3.8166             | 3.00E-04 | 6.1866               | 0        |
| NM_013292   | MYLPF: fast sk              | contraction/excitation | 1.5957     | 0.0177  | 0.5502                | 0.9232  | 1.241              | 0.3198   | 2.666              | 0.0087   | 3.7812               | 0.005    |
| NM_017534   | MYH2: myosin                | contraction/excitation | 1.249      | 0.1799  | 0.7656                | 0.833   | 1.2644             | 0.2741   | 0.8291             | 0.9274   | 0.8535               | 0.8595   |
| NM_079420   | MYL1: myosin,               | contraction/excitation | 1.0593     | 0.5051  | 0.9401                | 0.7294  | 2.9158             | 0.0104   | 2.6122             | 0.0243   | 6.9207               | 0        |
| NM_000290   | PGAM2: phosp                | metabolism             | 1.476      | 0.0095  | 1.5183                | 0.012   | 1.4157             | 0.0706   | 2.8819             | 0.0033   | 1.9172               | 0.0957   |
| NM_000766.3 | Homo sapiens                | metabolism             | 0.8879     | 0.7903  | 0.5491                | 0.999   | 0.7682             | 0.9377   | 0.9032             | 0.8175   | 0.9802               | 0.7424   |
| NM_00100197 | ATP5D: ATP s <sub>y</sub>   | metabolism             | 0.904      | 0.5603  | 0.6976                | 0.8087  | 0.362              | 0.9996   | 0.8372             | 0.7634   | 0.5827               | 0.8493   |
| NM_001824   | CKM: creatine               | metabolism             | 1.0257     | 0.2893  | 1.1134                | 0.322   | 1.8535             | 0.0736   | 1.6178             | 0.1907   | 4.6498               | 0.0022   |
| NM_002103.3 | glycogen synt <sub>t</sub>  | metabolism             | 1.1589     | 0.3113  | 1.1526                | 0.163   | 0.9884             | 0.6453   | 1.0012             | 0.7855   | 1.1331               | 0.5986   |
| NM_002625   | PFKFB1: 6-ph <sub>t</sub>   | metabolism             | 0.9921     | 0.5411  | 0.9766                | 0.5878  | 0.8484             | 0.8684   | 0.7626             | 0.9587   | 0.7436               | 0.9607   |
| NM_003837   | FBP2: fructose              | metabolism             | 0.8756     | 0.6637  | 1.1853                | 0.2126  | 1.1366             | 0.3311   | 0.877              | 0.8176   | 1.1884               | 0.4966   |
| NM_004102   | FABP3: fatty a              | metabolism             | 0.8458     | 0.913   | 0.676                 | 0.9949  | 1.0372             | 0.6239   | 0.9894             | 0.8206   | 0.9011               | 0.9226   |
| NM_004776   | B4GALT5: UDF                | metabolism             | 1.4472     | 0.0384  | 0.9298                | 0.5996  | 1.3497             | 0.2326   | 1.8493             | 0.0852   | 1.4077               | 0.1559   |
| NM_021245.2 | myozenin 1                  | metabolism             | 1.07       | 0.5232  | 1.2307                | 0.3046  | 1.6976             | 0.1621   | 1.2937             | 0.3926   | 1.2675               | 0.3962   |
| NM_133371.2 | myozenin 3                  | metabolism             | 1.0317     | 0.6205  | 1.1225                | 0.3649  | 0.9809             | 0.7928   | 0.809              | 0.9711   | 1.021                | 0.7828   |
| NM_00100281 | PDE4DIP: pho:               | Misc                   | 0.9654     | 0.632   | 0.6714                | 0.9759  | 0.9016             | 0.678    | 0.7743             | 0.9541   | 0.6561               | 0.9759   |
| NM_001234   | CAV3: caveolin              | Misc                   | 1.0096     | 0.6461  | 1.1517                | 0.3435  | 1.1424             | 0.5362   | 1.0752             | 0.6885   | 1.0732               | 0.6184   |
| NM_001835   | CLTCL1: clath <sub>r</sub>  | Misc                   | 1.0383     | 0.4075  | 1.0113                | 0.5083  | 1.0113             | 0.5083   | 1.2439             | 0.3284   | 0.9912               | 0.779    |
| NM_002152   | HRC: histidine              | Misc                   | 0.9373     | 0.7349  | 0.5851                | 0.9607  | 0.7277             | 0.7989   | 1.5014             | 0.2344   | 1.6063               | 0.407    |
| NM_002422.3 | Homo sapiens                | Misc                   | 1.1771     | 0.3055  | 1.0746                | 0.4219  | 0.8932             | 0.913    | 1.0223             | 0.7592   | 0.7624               | 0.9564   |
| NM_003356   | UCP3: uncoup                | Misc                   | 0.9178     | 0.801   | 0.7241                | 0.8617  | 0.8284             | 0.9272   | 0.806              | 0.9393   | 0.9473               | 0.7324   |
| NM_003673   | TCAP: titin-ca <sub>r</sub> | Misc                   | 0.7586     | 0.898   | 0.5816                | 0.9916  | 1.4212             | 0.1462   | 3.9784             | 0        | 5.1229               | 6.00E-04 |
| NM_006308   | HSPB3: heat s               | Misc                   | 0.7967     | 0.7944  | 0.8007                | 0.7657  | 1.0677             | 0.5312   | 1.0449             | 0.6227   | 1.3686               | 0.3053   |
| NM_007078   | LDB3: LIM dor               | Misc                   | 0.9387     | 0.7562  | 0.8057                | 0.9068  | 0.916              | 0.8561   | 0.7886             | 0.9578   | 0.7282               | 0.9649   |
| NM_015206   | KIAA1024: KI/               | Misc                   | 0.9034     | 0.7886  | 1.1365                | 0.3529  | 1.1592             | 0.3147   | 1.1803             | 0.4707   | 0.8979               | 0.8649   |
| NM_000540   | RYR1: ryanodi               | sarcoplasmic reticulum | 0.6473     | 0.9362  | 1.0011                | 0.2326  | 0.9854             | 0.6038   | 1.965              | 0.0624   | 2.0742               | 0.1425   |
| NM_001231.2 | calsequestrin               | sarcoplasmic reticulum | 1.0608     | 0.5329  | 0.6675                | 0.9736  | 1.2553             | 0.2551   | 1.1552             | 0.4497   | 1.1325               | 0.6271   |
| NM_001232   | CASQ2: calsec               | sarcoplasmic reticulum | 1.0608     | 0.2487  | 0.6563                | 0.9502  | 1.0908             | 0.3134   | 1.5677             | 0.0638   | 1.1989               | 0.4389   |
| NM_004274.3 | A kinase (PRK,              | sarcoplasmic reticulum | 1.0738     | 0.4072  | 1.1452                | 0.261   | 1.0244             | 0.5735   | 0.9854             | 0.7848   | 1.1682               | 0.4692   |
| NM_006073.1 | triadin                     | sarcoplasmic reticulum | 1.2387     | 0.2423  | 1.4644                | 0.0791  | 1.1913             | 0.3374   | 1.2423             | 0.3957   | 1.0243               | 0.7981   |
| NM_020647.2 | junctophilin 1              | sarcoplasmic reticulum | 1.2364     | 0.2141  | 0.6472                | 0.9907  | 1.6824             | 0.0683   | 1.3255             | 0.3162   | 0.9645               | 0.6824   |
| NM_000109.2 | dystrophin (m               | surface/structure      | 1.5284     | 0.0307  | 0.9091                | 0.5422  | 1.2772             | 0.2905   | 1.1493             | 0.5824   | 1.1877               | 0.3532   |
| NM_000117.1 | emerin (Emery               | surface/structure      | 0.6802     | 0.9914  | 1.2276                | 0.2628  | 0.8752             | 0.8188   | 0.9013             | 0.847    | 0.9413               | 0.8907   |
| NM_000231   | SGCG: sarcogl               | surface/structure      | 1.2055     | 0.2652  | 1.0582                | 0.4526  | 1.176              | 0.4262   | 1.0951             | 0.6536   | 1.0935               | 0.7405   |
| NM_000337   | SGCD: sarcogl               | surface/structure      | 1.0506     | 0.5864  | 1.0017                | 0.6245  | 0.964              | 0.7976   | 1.0036             | 0.7833   | 0.895                | 0.8684   |
| NM_001104   | ACTN3: actinir              | surface/structure      | 1.4479     | 0.0274  | 0.9626                | 0.397   | 1.5427             | 0.1084   | 3.0884             | 0.0025   | 3.1087               | 0.0261   |
| NM_001782   | CD72: CD72 a                | surface/structure      | 0.6817     | 0.9909  | 0.9591                | 0.6575  | 0.904              | 0.7846   | 1.1063             | 0.3734   | 0.8344               | 0.9399   |
| NM_003637   | ITGA10: integri             | surface/structure      | 0.9721     | 0.7091  | 0.6803                | 0.9699  | 0.8524             | 0.8391   | 0.8619             | 0.8516   | 0.874                | 0.8886   |
| NM_004393.1 | dystroglycan 1              | surface/structure      | 1.1926     | 0.2547  | 1.2026                | 0.1574  | 1.0127             | 0.6359   | 1.0564             | 0.5936   | 1.0643               | 0.6408   |
| NM_004933.2 | cadherin 15, I              | surface/structure      | 1.0205     | 0.5655  | 1.0797                | 0.446   | 0.9062             | 0.7812   | 1.2212             | 0.4266   | 1.23                 | 0.4172   |
| NM_005055   | RAPSN: recept               | surface/structure      | 1.097      | 0.5302  | 1.3449                | 0.1495  | 0.8962             | 0.8751   | 1.2155             | 0.4966   | 1.2707               | 0.5259   |
| NM_000325   | PITX2: paired-              | transcription factors  | 1.1476     | 0.3426  | 1.1204                | 0.4086  | 1.0368             | 0.533    | 1.0835             | 0.6736   | 1.1427               | 0.6421   |
| NM_00100141 | SMAD5: SMAD                 | transcription factors  | 0.8066     | 0.9675  | 1.0555                | 0.5482  | 0.9046             | 0.9051   | 0.7453             | 0.9937   | 0.812                | 0.9472   |
| NM_002165.2 | inhibitor of DN             | transcription factors  | 1.1002     | 0.2997  | 0.7448                | 0.9268  | 0.5188             | 0.9868   | 0.5165             | 0.9977   | 0.7705               | 0.9012   |
| NM_002478   | MYOD1: Myo <sub>c</sub>     | transcription factors  | 0.6438     | 0.8273  | 1.1613                | 0.0906  | 0.7625             | 0.3787   | 0.5802             | 0.7591   | 0.6984               | 0.9013   |
| NM_002479   | MYOG: myoge                 | transcription factors  | 0.8473     | 0.2214  | 0.6608                | 0.5226  | 0.3355             | 0.9203   | 0.4548             | 0.741    | 0.3207               | 0.9988   |
| NM_003199.1 | transcription fi            | transcription factors  | 1.1036     | 0.4257  | 0.7415                | 0.9749  | 1.1059             | 0.5422   | 1.2442             | 0.3186   | 0.8862               | 0.8771   |
| NM_003200.1 | transcription fi            | transcription factors  | 1.0284     | 0.6016  | 1.1082                | 0.3981  | 0.9129             | 0.8457   | 0.8316             | 0.9654   | 0.7281               | 0.9861   |
| NM_003205.3 | transcription fi            | transcription factors  | 1.2646     | 0.133   | 0.9732                | 0.5262  | 1.2931             | 0.308    | 1.032              | 0.6457   | 0.8697               | 0.8599   |
| NM_005098.2 | musculin (acti              | transcription factors  | 1.0818     | 0.4093  | 1.0392                | 0.5466  | 1.0131             | 0.6613   | 1.1247             | 0.5748   | 0.8736               | 0.9406   |
| NM_005587.1 | MADS box trar               | transcription factors  | 1.0704     | 0.3061  | 0.9244                | 0.6004  | 0.9191             | 0.7219   | 0.9102             | 0.8418   | 0.9234               | 0.6926   |
| NM_005593   | MYF5: myoge                 | transcription factors  | 1.0989     | 0.4249  | 0.9942                | 0.5189  | 1.0844             | 0.5247   | 1.0167             | 0.7697   | 0.7086               | 0.983    |
| NM_005919.1 | MADS box trar               | transcription factors  | 0.7883     | 0.9724  | 0.9039                | 0.8193  | 1.0566             | 0.6175   | 0.9996             | 0.7845   | 1.0646               | 0.677    |
